# Supplementary material for: Thoracic SMARCA4-deficient tumors: a clinicopathological analysis of 52 cases with SMARCA4-deficient non-small cell lung cancer and 20 cases with thoracic SMARCA4-deficient undifferentiated tumor
Source: PeerJ. 2024 Feb 16;12:e16923. doi: 10.7717/peerj.16923 (PMC10875988; doi:10.7717/peerj.16923)
Supplement: Supplemental Information 1 [file peerj-12-16923-s001.xlsx]

## Sheet: Raw data
Subtype	NO.	Sex	Age	Smoking	Position	Histopathological type	TNM	Surgical treatme0t	NO.	PCK	EMA	CK7	TTF-1	NapsinA	P63	P40	CK5/6	Syn	CD34	Ki67(%)	ALK-V	ROS1	PD-L1(TPS,%)	NO.	Architecture	Necrosis	Rhabdoid cells	Desmoplastic stroma	Myxoid stroma	Neutrophil infiltration	Inflamatory infiltrtion
NSCLC	No.1	M	64	Y	Left upper lobe	AC	1	1	No.1	+	+	+	Scattered+	Scattered+	-	-	-	-	-	/	-	-	60	No.1	Solid	Necrosis
NSCLC	No.2	M	55	Y	Left upper lobe	LCC	1	1	No.2	P+	P+	Scattered+	-	-	Focal+	Scattered+	-	Focal+	-	90	-	-	0	No.2	Solid and aciner	Necrosis
NSCLC	No.3	M	50	Y	Right lower lobe	LCC	3	1	No.3	+	/	+	-	-	-	/	-	/	-	70	-	-	80	No.3	Solid	Necrosis					Yes
NSCLC	No.4	M	51	Y	Left upper lobe	LCC	3	1	No.4	+	+	+	-	-	-	-	-	-	-	60	-	-	0	No.4	Solid
NSCLC	No.5	M	57	Y	Right lower lobe	LCNEC+AC	3	1	No.5	+	+	+	+	-	-	-	-	-	-	60	-	-	0	No.5	Solid	Necrosis
NSCLC	No.6	M	72	Y	Left lower lobe	AC	3	1	No.6	+	+	+	-	-	-	-	-	-	-	30	-	-	0	No.6	Solid			Yes
NSCLC	No.7	M	53	Y	Right lower lobe	AC	3	1	No.7	+	+	+	-	-	-	-	-	-	-	60	-	-	0	No.7	Solid					Yes	Yes
NSCLC	No.8	M	63	N	Left upper lobe	AC	4	1	No.8	+	+	-	-	-	-	-	-	-	-	30	-	-	0	No.8	Solid	Necrosis		Yes
NSCLC	No.9	M	68	Y	Right upperr lobe	LCC	3	1	No.9	-	P+	-	-	-	-	-	-	-	-	50	-	-	0	No.9	Solid	Necrosis
NSCLC	No.10	M	65	Y	Right upperr lobe	AC	1	1	No.10	+	+	+	-	-	-	/	/	-	-	90	-	-	0	No.10	Solid	Necrosis				Yes	Yes
NSCLC	No.11	M	74	Y	Left upper lobe	AC	1	1	No.11	+	+	+	-	-	-	-	-	-	-	90	-	-	0	No.11	Solid and aciner	Necrosis			Yes	Yes	Yes
NSCLC	No.12	M	34	N	Left upper lobe	AC	3	1	No.12	+	+	+	-	-	-	-	-	-	-	70	-	-	5	No.12	Solid	Necrosis				Yes	Yes
NSCLC	No.13	M	53	Y	Right middle lobe	LCC	2	1	No.13	+	+	P+	-	-	-	-	-	-	-	80	-	-	30	No.13	Solid	Necrosis				Yes	Yes
NSCLC	No.14	M	42	Y	Right upperr lobe	AC	3	1	No.14	+	+	+	-	P+	-	-	-	-	-	/	-	-	0	No.14	Solid	Necrosis		Yes
NSCLC	No.15	M	69	Y	Left lower lobe	AC	3	1	No.15	-	+	+	-	-	-	-	-	-	-	40	-	-	0	No.15	Solid and aciner	Necrosis		Yes		Yes	Yes
NSCLC	No.16	M	55	Y	Right upperr lobe	AC	3	1	No.16	+	+	+	-	-	-	-	-	-	-	20	-	-	0	No.16	Solid	Necrosis	Rhabdoid cells				Yes
NSCLC	No.17	M	67	Y	Right upperr lobe	LCC	1	1	No.17	+	P+	-	-	-	Scattered+	-	Scattered+	-	-	90	-	-	0	No.17	Solid						Yes
NSCLC	No.18	M	59	Y	Right upperr lobe	LCC	3	1	No.18	/	/	+	-	-	-	/	-	-	-	20	-	-	0	No.18	Solid	Necrosis
NSCLC	No.19	M	53	Y	Left upper lobe	NOS	3	1	No.19	P+	/	Focal+	/	/	+	/	Focal+	-	/	60	/	/	/	No.19	Solid					Yes	Yes
NSCLC	No.20	M	66	N	Right middle lobe	AC	4	0	No.20	/	/	+	-	-	/	-	P+	-	-	/	-	-	5	No.20	Solid	Necrosis	Rhabdoid cells
NSCLC	No.21	M	65	N	Right middle lobe	AC	4	0	No.21	/	/	+	-	-	-	-	-	-	-	-	-	-	0	No.21	Solid	Necrosis
NSCLC	No.22	M	51	N	Mediastinum	NOS	/	0	No.22	-	+	-	-	-	/	-	/	+	-	70	/	/	/	No.22	Solid	Necrosis
NSCLC	No.23	M	69	Y	Right middle lobe	NOS	/	0	No.23	Scattered+	+	-	-	-	Scattered+	Scattered+	Scattered+	P+	-	50	-	-	0	No.23	Solid
NSCLC	No.24	M	65	Y	Left upper lobe	AC	4	0	No.24	+	/	+	P+	+	/	-	-	/	-	/	-	-	/	No.24	Solid
NSCLC	No.25	M	54	Y	Left upper lobe	AC	4	0	No.25	Scattered+	/	+	-	/	/	-	/	-	+	/	/	/	/	No.25	Solid		Rhabdoid cells			Yes
NSCLC	No.26	M	78	Y	Right upperr lobe	AC	3	0	No.26	/	/	+	-	-	-	-	-	-	-	20	-	-	0	No.26	Solid	Necrosis	Rhabdoid cells
NSCLC	No.27	M	55	Y	Left upper lobe	AC	4	0	No.27	+	/	+	-	-	/	-	-	-	/	60	-	-	0	No.27	Solid
NSCLC	No.28	M	58	Y	Left lung	AC	4	0	No.28	/	/	+	-	-	-	/	/	/	/	/	-	-	0	No.28	Solid	Necrosis	Rhabdoid cells
NSCLC	No.29	M	62	Y	Right upperr lobe	AC	4	0	No.29	/	/	+	-	/	-	/	-	/	/	/	-	-	/	No.29	Solid		Rhabdoid cells
NSCLC	No.30	M	60	Y	Right upperr lobe	AC	4	0	No.30	+	/	+	-	-	/	/	-	/	/	/	-	-	/	No.30	Solid		Rhabdoid cells
NSCLC	No.31	M	66	Y	Left upper lobe	AC	4	0	No.31	/	/	+	-	P+	/	/	/	/	/	/	-	-	/	No.31	Solid		Rhabdoid cells		Yes
NSCLC	No.32	M	55	Y	Left upper lobe	AC	4	0	No.32	/	/	+	-	/	-	/	-	/	/	/	-	-	/	No.32	Solid
NSCLC	No.33	M	53	Y	Right middle lobe	NOS	3	0	No.33	+	/	+	-	-	-	/	-	/	/	30	-	-	/	No.33	Solid
NSCLC	No.34	M	60	Y	Right upperr lobe	AC	4	0	No.34	+	+	+	-	/	-	/	-	/	-	/	-	-	/	No.34	Scattered
NSCLC	No.35	M	57	Y	Right lung	NOS	/	0	No.35	/	/	+	-	-	-	/	-	/	/	/	/	/	/	No.35	Solid	Necrosis	Rhabdoid cells				Yes
NSCLC	No.36	M	60	Y	Right lower lobe	AC	4	0	No.36	Scattered+	/	+	-	-	-	-	/	/	/	/	-	-	/	No.36	Solid	Necrosis
NSCLC	No.37	M	66	Y	Pleura	NOS	/	0	No.37	+	+	/	-	/	/	/	/	/	/	60	/	/	/	No.37	Solid
NSCLC	No.38	M	52	N	Left upper lobe	nos	4	0	No.38	/	/	+	-	/	-	-	/	-	/	70	/	/	0	No.38	Solid
NSCLC	No.39	M	75	Y	Right upperr lobe	NOS	/	0	No.39	+	/	/	-	-	+	/	/	-	/	40	-	-	/	No.39	Solid				Yes	Yes
NSCLC	No.40	M	58	Y	Right middle lobe	AC	3	0	No.40	+	+	+	-	/	/	-	/	-	-	-	-	-	60	No.40	Solid		Rhabdoid cells
NSCLC	No.41	M	58	Y	Left upper lobe	NOS	2	0	No.41	+	/	/	-	/	-	/	-	-	-	/	/	/	/	No.41	Scattered
NSCLC	No.42	F	70	/	Chest wall	AC	/	0	No.42	/	+	+	/	/	-	-	/	/	-	/	/	/	/	No.42	Solid
NSCLC	No.43	M	63	/	Right lower lobe	NOS	/	1	No.43	+	/	/	-	/	-	/	/	-	/	/	/	/	/	No.43	Solid	Necrosis
NSCLC	No.44	M	56	/	Right upperr lobe	NOS	/	1	No.44	+	/	/	-	/	P+	/	/	P+	/	90	/	/	/	No.44	Solid	Necrosis
NSCLC	No.45	M	57	Y	Right lung	NOS	4	0	No.45	Scattered+	+	Scattered+	P+	/	/	-	-	P+	-	80	-	-	3	No.45	Solid	Necrosis			Yes	Yes
NSCLC	No.46	M	68	Y	Lung and Chest	AC	4	1	No.46	/	/	+	-	-	-	-	-	P+	/	/	/	/	/	No.46	Solid
NSCLC	No.47	M	48	N	Left lower lobe	AC	3	1	No.47	+	/	+	-	-	-	-	-	-	-	90	-	-	/	No.47	Solid and aciner
NSCLC	No.48	M	70	Y	Right upperr lobe	AC	3	1	No.48	+	/	+	p+	-	-	-	-	-	-	/	-	-	/	No.48	Solid
NSCLC	No.49	M	64	Y	Mediastinum	AC	2	1	No.49	+	/	+	-	-	-	-	-	-	-	80	/	/	/	No.49	Solid	Necrosis
NSCLC	No.50	M	65	Y	Right lower lobe	AC	2	1	No.50	+	/	p+	-	-	-	-	-	+	-	70	-	-	/	No.50	Solid
NSCLC	No.51	M	57	Y	Left upper lobe	LCC	3	1	No.51	+	+	+	-	-	-	-	-	-	/	/	-	-	/	No.51	Solid
NSCLC	No.52	M	55	Y	Right lower lobe	AC	4	1	No.52	+	/	+	-	/	-	-	-	/	-		-	-	0	No.52	Solid
Subtype	NO.	Sex	Age	Smoking	Position	Histopathological type	TNM	Surgical treatme0t	NO.	PCK	EMA	CK7	TTF-1	NapsinA	P63	P40	CK5/6	Syn	CD34	Ki67(%)	ALK-V	ROS1	PD-L1(TPS,%)	NO.	Architecture	Necrosis	Rhabdoid cells	Desmoplastic stroma	Myxoid stroma	Neutrophil infiltration	Inflamatory infiltrtion
UT	No.1	M	60	Y	Left upper lobe	UT	4	1	No.1	Scattered+	Scattered+	-	-	-	-	-	-	-	+	70	-	-	40	No.1	Solid	Necrosis	Rhabdoid cells
UT	No.2	M	56	Y	Left lower lobe	UT	4	1	No.2	Scattered+	Scattered+	-	-	-	-	-	-	-	+	70	-	-	0	No.2	Solid	Necrosis	Rhabdoid cells
UT	No.3	M	51	Y	Mediastinum	UT	4	1	No.3	-	-	/	-	/	-	/	/	/	/	/	/	/	/	No.3	Solid						Yes
UT	No.4	M	72	Y	Right lower lobe	UT	/	1	No.4	Focal+	Focal+	-	-	-	-	-	-	Focal+	+	50	-	-	/	No.4	Solid	Necrosis	Rhabdoid cells			Yes	Yes
UT	No.5	M	50	Y	Chest wall	UT	2	0	No.5	-	-	-	-	-	-	/	-	+	+	70	-	-	<1	No.5	Solid	Necrosis
UT	No.6	M	63	Y	Pleura	UT	4	0	No.6	Focal+	Scattered+	/	/	/	/	/	/	/	+	/	/	/	/	No.6	Solid	Necrosis
UT	No.7	M	63	Y	Lung	UT	4	0	No.7	Focal+	/	/	-	-	-	/	/	-	/	/	/	/	/	No.7	Solid	Necrosis	Rhabdoid cells			Yes
UT	No.8	M	55	Y	Left lower lobe	UT	4	0	No.8	-	Scattered+	-	-	-	-	-	/	+	+	80	/	/	/	No.8	Solid
UT	No.9	M	63	/	Mediastinum	UT	4	0	No.9	Scattered+	/	/	-	/	/	/	/	/	P+	/	/	/	/	No.9	Solid		Rhabdoid cells
UT	No.10	M	64	/	Lung	UT	/	0	No.10	-	/	/	-	/	/	/	-	+	P+	/	/	/	/	No.10	Solid		Rhabdoid cells
UT	No.11	M	61	Y	Mediastinum	UT	4	0	No.11	-	Scattered+	-	-	-	/	-	-	P+	+	80	-	-	30	No.11	Solid
UT	No.12	M	54	Y	Mediastinum	UT	4	0	No.12	-	Scattered+	Focal+	-	-	-	/	-	+	+	30	-	-	0	No.12	Solid		Rhabdoid cells		Yes
UT	No.13	M	62	Y	Left upper lobe	UT	3	1	No.13	Focal+	Focal+	Focal+	-	-	-	-	-	-	+	60	-	-	0	No.13	Solid	Necrosis	Rhabdoid cells			Yes
UT	N0.14	M	71	Y	Pleura	UT	3	0	No.14	-	/	-	-	/	+	/	/	-	+	70	/	/	/	No.14	Solid				Yes
UT	N0.15	M	69	Y	Mediastinum	UT	4	0	N0.15	-	/	-	-	-	-	-	-	+	/	90	/	/	0	N0.15	Solid
UT	No.16	M	55	Y	Left lung	UT	4	0	No.16	-	Scattered+		-	/	/	/		-	Scattered+	70	/	/		No.16	Solid	Necrosis	Rhabdoid cells
UT	No.17	M	61	/	Left upper lobe	UT	/	0	No.17	Scattered+	Scattered+	-	-		-			+		40			0	No.17	Solid
UT	No.18	M	51	/	Left upper lobe	UT	/	0	No.18	-										90				No.18	Solid
UT	No.19	M	67	Y	Left upper lobe	UT	4	0	No.19	-	-	-	-	-		-		Focal+	-		-	-		No.19	Solid		Rhabdoid cells				Inflamatory infiltrtion
UT	No.20	M	39	Y	Mediastinum	UT	4	1	No.20	-	focal+	-	-	-	-			+	+					No.20	Solid		Rhabdoid cells
